# Supplementary material for: ARMADiLLO: a web server for analyzing antibody mutation probabilities
Source: PubMed Central journal article supplement — Nucleic Acids Res. 2023 Jun 1;51(W1):W51–6. doi: 10.1093/nar/gkad398 (PMC10320107; doi:10.1093/nar/gkad398), 2023-06-01
Supplement: gkad398_supplemental_file.pdf [file gkad398_supplemental_file.pdf]

# Supplementary Data

**Table S1. Probability Estimates of Representative Mutations in Antibody DH270.6**

| Mutation <sup>†</sup> | Number of Simulated Sequences Used in Mutation Probability Estimate |                     |                               |                     |                               |                     |
|-----------------------|---------------------------------------------------------------------|---------------------|-------------------------------|---------------------|-------------------------------|---------------------|
|                       | n=10,000                                                            |                     | n=100,000                     |                     | n=1,000,000                   |                     |
|                       | Mean Probability <sup>^</sup>                                       | 95% CI <sup>^</sup> | Mean Probability <sup>^</sup> | 95% CI <sup>^</sup> | Mean Probability <sup>^</sup> | 95% CI <sup>^</sup> |
| <b>N54Q</b>           | 0.0034                                                              | 0.0030-0.0037       | 0.0032                        | 0.0031-0.0033       | 0.0032                        | 0.0031-0.0032       |
| <b>K23A</b>           | 0.0059                                                              | 0.0053-0.0064       | 0.0058                        | 0.0056-0.0059       | 0.0059                        | 0.0058-0.0059       |
| <b>G57R</b>           | 0.0126                                                              | 0.0123-0.0129       | 0.0127                        | 0.0125-0.0128       | 0.0125                        | 0.0124-0.0125       |
| <b>R98T</b>           | 0.0190                                                              | 0.0180-0.0199       | 0.0188                        | 0.0186-0.0189       | 0.0187                        | 0.0186-0.0188       |
| <b>V11M</b>           | 0.0588                                                              | 0.0576-0.0599       | 0.0593                        | 0.0588-0.0598       | 0.0595                        | 0.0593-0.0596       |
| <b>A24P</b>           | 0.0810                                                              | 0.0797-0.0824       | 0.0807                        | 0.0802-0.0812       | 0.0808                        | 0.0807-0.0809       |
| <b>G31D</b>           | 0.1307                                                              | 0.1286-0.1327       | 0.1322                        | 0.1315-0.1328       | 0.1326                        | 0.1325-0.1327       |
| <b>R85S</b>           | 0.1223                                                              | 0.1203-0.1244       | 0.1213                        | 0.1208-0.1218       | 0.1215                        | 0.1213-0.1217       |

<sup>†</sup> Representative set of DH270.6 mutations chosen over a range of probabilities varying from very low probability to very high probability.

<sup>^</sup> Means of probability and 95% confidence intervals were computed from n=10 independent ARMADiLLO runs with the DH270.6 antibody as the input sequence and using the specified number of simulated sequences (10,000, 100,000, or 1,000,000).
